# Supplementary material
Source: PubMed Central journal article supplement (PMC10536758)
Supplement: NIHMS1920371-supplement-1.pdf [file NIHMS1920371-supplement-1.pdf]

**Supplemental Table S1. Diagnostic Codes for Traumatic Spinal Cord Injury**

**ICD9 Codes**

|                                     |                                                                                                                                                                                                                                                                                                                                                                                                                                                                                                                                                                                                                               |
|-------------------------------------|-------------------------------------------------------------------------------------------------------------------------------------------------------------------------------------------------------------------------------------------------------------------------------------------------------------------------------------------------------------------------------------------------------------------------------------------------------------------------------------------------------------------------------------------------------------------------------------------------------------------------------|
| <b>Traumatic Spinal Cord Injury</b> | 806.00, 806.01, 806.02, 806.03, 806.04, 806.05, 806.06, 806.07, 806.08, 806.09, 806.10, 806.11, 806.12, 806.13, 806.14, 806.15, 806.16, 806.17, 806.18, 806.19, 806.20, 806.21, 806.22, 806.23, 806.24, 806.25, 806.26, 806.27, 806.28, 806.29, 806.30, 806.31, 806.32, 806.33, 806.34, 806.35, 806.36, 806.37, 806.38, 806.39, 806.4, 806.5, 806.60, 806.61, 806.62, 806.69, 806.70, 806.71, 806.72, 806.79, 806.8, 806.9, 952.00, 952.01, 952.02, 952.03, 952.04, 952.05, 952.06, 952.07, 952.08, 952.09, 952.10, 952.11, 952.12, 952.13, 952.14, 952.15, 952.16, 952.17, 952.18, 952.19, 952.2, 952.3, 952.4, 952.8, 952.9 |
|-------------------------------------|-------------------------------------------------------------------------------------------------------------------------------------------------------------------------------------------------------------------------------------------------------------------------------------------------------------------------------------------------------------------------------------------------------------------------------------------------------------------------------------------------------------------------------------------------------------------------------------------------------------------------------|

**Supplemental Table S2. Diagnostic Codes for Alzheimer’s Disease and Related Dementia**

---

**ICD9/ICD10 Codes**

---

|                                                 |                                                                                                                                                                                                                       |
|-------------------------------------------------|-----------------------------------------------------------------------------------------------------------------------------------------------------------------------------------------------------------------------|
| <b>Alzheimer’s Disease and Related Dementia</b> | 290.0, 290.10, 290.11, 290.12, 290.13, 290.20, 290.21, 290.3, 290.40, 290.41, 290.42, 290.43, 290.8, 290.9, 294.11, 294.12, 294.20, 294.21, 331.0<br>F0150, F0151, F0280, F0281, F0390, F0391, G300, G301, G308, G309 |
|-------------------------------------------------|-----------------------------------------------------------------------------------------------------------------------------------------------------------------------------------------------------------------------|

## Supplemental Figure S1. Schematic Flow Diagram

### Main Cohort

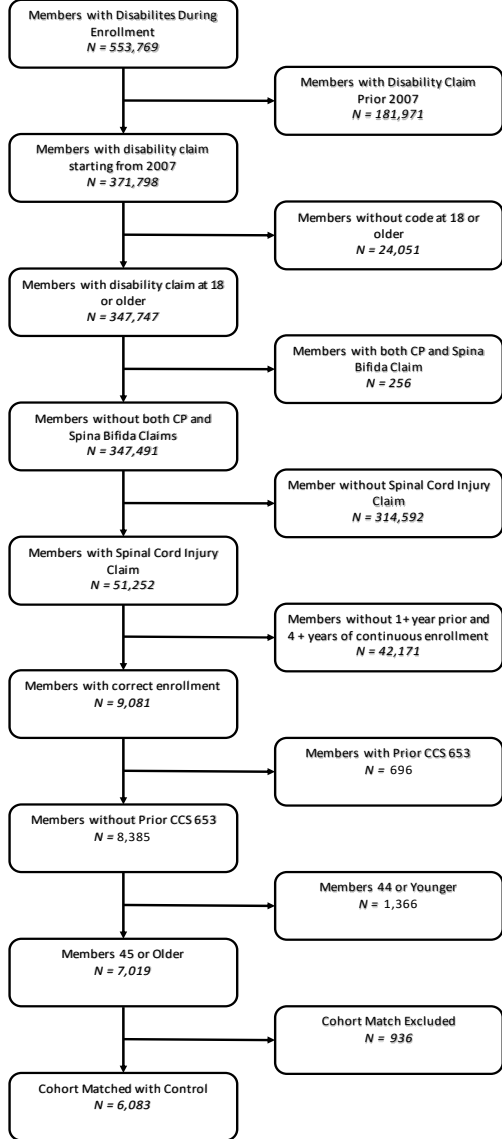

### Control Cohort

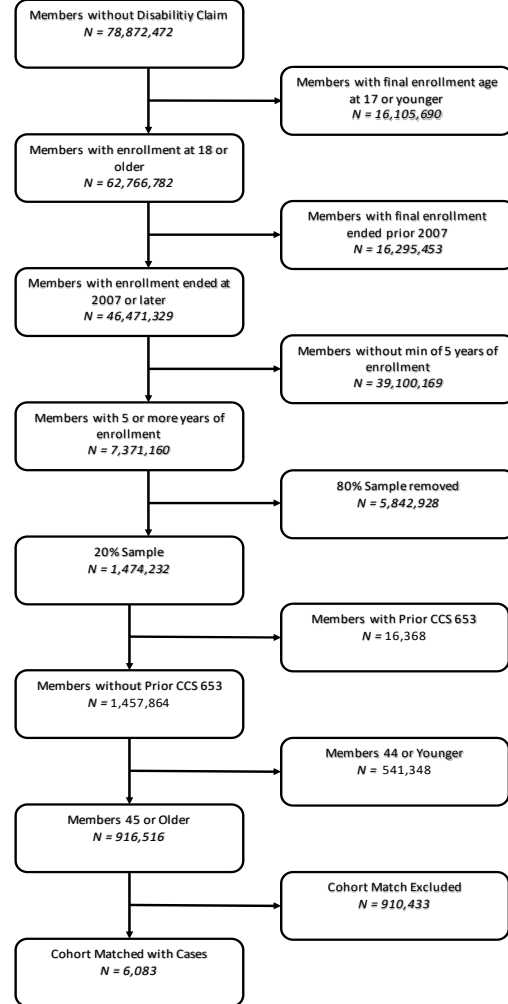

**Supplemental Table S3. Diagnostic Codes for Comorbid Conditions**

| <b>ICD9/ICD10 Codes</b>                        |                                                                                                                                                                                                                                                                                                                                                                                                                                                                                                                                                                                                                                                                                            |
|------------------------------------------------|--------------------------------------------------------------------------------------------------------------------------------------------------------------------------------------------------------------------------------------------------------------------------------------------------------------------------------------------------------------------------------------------------------------------------------------------------------------------------------------------------------------------------------------------------------------------------------------------------------------------------------------------------------------------------------------------|
| <b>Diagnosis Group</b>                         |                                                                                                                                                                                                                                                                                                                                                                                                                                                                                                                                                                                                                                                                                            |
| <b>Cardiometabolic Outcome Group</b>           |                                                                                                                                                                                                                                                                                                                                                                                                                                                                                                                                                                                                                                                                                            |
| <b>Cardiac dysrhythmias</b>                    | 427.0, 427.1, 427.2, 427.31, 427.32, 427.60, 427.61, 427.69, 427.81, 427.89, 427.9, 785.0, 785.1<br>I47.0, I47.1, I47.2, I47.9, I48.0, I48.1, I48.2, I48.3, I48.4, I48.91, I48.92, I49.1, I49.2, I49.3, I49.40, I49.49, I49.5, I49.8, I49.9, R00.0, R00.1, R00.2                                                                                                                                                                                                                                                                                                                                                                                                                           |
| <b>Heart Failure</b>                           | 427.41, 427.42, 427.5, 428.0, 428.1, 428.20, 428.21, 428.22, 428.23, 428.30, 428.31, 428.32, 428.33, 428.40, 428.41, 428.42, 428.43, 428.9<br>I46.2, I46.8, I46.9, I49.01, I49.02, I50.1, I50.20, I50.21, I50.22, I50.23, I50.30, I50.31, I50.32, I50.33, I50.40, I50.41, I50.42, I50.43, I50.810, I50.811, I50.812, I50.813, I50.814, I50.82, I50.83, I50.84, I50.89, I50.9                                                                                                                                                                                                                                                                                                               |
| <b>Peripheral and visceral Atherosclerosis</b> | 440.0, 440.1, 440.2, 440.20, 440.21, 440.22, 440.23, 440.29, 440.4, 440.8, 440.9, 443.9, 557.0, 557.1, 557.9<br>I70.0, I70.1, I70.201, I70.202, I70.203, I70.208, I70.209, I70.211, I70.212, I70.213, I70.218, I70.219, I70.221, I70.222, I70.223, I70.228, I70.229, I70.231, I70.232, I70.233, I70.234, I70.235, I70.238, I70.239, I70.241, I70.242, I70.243, I70.244, I70.245, I70.248, I70.249, I70.25, I70.291, I70.292, I70.293, I70.298, I70.299, I70.8, I70.90, I70.91, I70.92, I73.9, K55.0, K55.011, K55.012, K55.019, K55.021, K55.022, K55.029, K55.031, K55.032, K55.039, K55.041, K55.042, K55.049, K55.051, K55.052, K55.059, K55.061, K55.062, K55.069, K55.1, K55.8, K55.9 |
| <b>Non-Alcoholic Fatty Liver Disease</b>       | 571.8, 571.9<br>K76.0, K76.89, K76.9                                                                                                                                                                                                                                                                                                                                                                                                                                                                                                                                                                                                                                                       |
| <b>Chronic kidney disease</b>                  | 585, 585.1, 585.2, 585.3, 585.4, 585.5, 585.6, 585.9, 792.5, V42.0, V45.1, V45.11, V45.12, V56.0, V56.1, V56.2, V56.31, V56.32, V56.8<br>N18.1, N18.2, N18.3, N18.4, N18.5, N18.6, N18.9, R88.0, Z49.01, Z49.02, Z49.31, Z49.32, Z91.15, Z94.0, Z99.2                                                                                                                                                                                                                                                                                                                                                                                                                                      |
| <b>Type 2 Diabetes</b>                         | 250.00, 250.02, 250.10, 250.12, 250.20, 250.22, 250.30, 250.32, 250.40, 250.42, 250.50, 250.52, 250.60, 250.62, 250.70, 250.72, 250.80, 250.82, 250.90, 250.92<br>E11.00, E11.01, E11.10, E11.11, E11.21, E11.22, E11.29, E11.311, E11.319, E11.321, E11.3211, E11.3212, E11.3213, E11.3219, E11.329, E11.3291, E11.3292, E11.3293, E11.3299, E11.331, E11.3311, E11.3312, E11.3313, E11.3319, E11.339, E11.3391, E11.3392, E11.3393, E11.3399, E11.341, E11.3411, E11.3412, E11.3413, E11.3419, E11.349, E11.3491, E11.3492, E11.3493, E11.3499, E11.351, E11.3511, E11.3512, E11.3513, E11.3519, E11.3521, E11.3522, E11.3523, E11.3529,                                                 |

|                                                |                                                                                                                                                                                                                                                                                                                                                                                                                                                                                                                                                                                                                                                                                            |
|------------------------------------------------|--------------------------------------------------------------------------------------------------------------------------------------------------------------------------------------------------------------------------------------------------------------------------------------------------------------------------------------------------------------------------------------------------------------------------------------------------------------------------------------------------------------------------------------------------------------------------------------------------------------------------------------------------------------------------------------------|
|                                                | E11.3531, E11.3532, E11.3533, E11.3539, E11.3541, E11.3542, E11.3543, E11.3549, E11.3551, E11.3552, E11.3553, E11.3559, E11.359, E11.3591, E11.3592, E11.3593, E11.3599, E11.36, E11.37X1, E11.37X2, E11.37X3, E11.37X9, E11.39, E11.40, E11.41, E11.42, E11.43, E11.44, E11.49, E11.51, E11.52, E11.59, E11.610, E11.618, E11.620, E11.621, E11.622, E11.628, E11.630, E11.638, E11.641, E11.649, E11.65, E11.69, E11.8, E11.9                                                                                                                                                                                                                                                            |
| <b>Hypercholesterolemia</b>                    | 272.0, 272.1<br>E78.0, E78.00, E78.01, E78.1                                                                                                                                                                                                                                                                                                                                                                                                                                                                                                                                                                                                                                               |
| <b>Hypertension</b>                            | 401.0, 401.1, 401.9, 402.00, 402.01, 402.10, 402.11, 402.90, 402.91, 403.0, 403.00, 403.01, 403.1, 403.10, 403.11, 403.9, 403.90, 403.91, 404.0, 404.00, 404.01, 404.02, 404.03, 404.1, 404.10, 404.11, 404.12, 404.13, 404.9, 404.90, 404.91, 404.92, 404.93, 405.01, 405.09, 405.11, 405.19, 405.91, 405.99, 437.2<br>I10, I11.0, I11.9                                                                                                                                                                                                                                                                                                                                                  |
| <b>Cardiac dysrhythmias</b>                    | 427.0, 427.1, 427.2, 427.31, 427.32, 427.60, 427.61, 427.69, 427.81, 427.89, 427.9, 785.0, 785.1<br>I47.0, I47.1, I47.2, I47.9, I48.0, I48.1, I48.2, I48.3, I48.4, I48.91, I48.92, I49.1, I49.2, I49.3, I49.40, I49.49, I49.5, I49.8, I49.9, R00.0, R00.1, R00.2                                                                                                                                                                                                                                                                                                                                                                                                                           |
| <b>Heart Failure</b>                           | 427.41, 427.42, 427.5, 428.0, 428.1, 428.20, 428.21, 428.22, 428.23, 428.30, 428.31, 428.32, 428.33, 428.40, 428.41, 428.42, 428.43, 428.9<br>I46.2, I46.8, I46.9, I49.01, I49.02, I50.1, I50.20, I50.21, I50.22, I50.23, I50.30, I50.31, I50.32, I50.33, I50.40, I50.41, I50.42, I50.43, I50.810, I50.811, I50.812, I50.813, I50.814, I50.82, I50.83, I50.84, I50.89, I50.9                                                                                                                                                                                                                                                                                                               |
| <b>Peripheral and visceral Atherosclerosis</b> | 440.0, 440.1, 440.2, 440.20, 440.21, 440.22, 440.23, 440.29, 440.4, 440.8, 440.9, 443.9, 557.0, 557.1, 557.9<br>I70.0, I70.1, I70.201, I70.202, I70.203, I70.208, I70.209, I70.211, I70.212, I70.213, I70.218, I70.219, I70.221, I70.222, I70.223, I70.228, I70.229, I70.231, I70.232, I70.233, I70.234, I70.235, I70.238, I70.239, I70.241, I70.242, I70.243, I70.244, I70.245, I70.248, I70.249, I70.25, I70.291, I70.292, I70.293, I70.298, I70.299, I70.8, I70.90, I70.91, I70.92, I73.9, K55.0, K55.011, K55.012, K55.019, K55.021, K55.022, K55.029, K55.031, K55.032, K55.039, K55.041, K55.042, K55.049, K55.051, K55.052, K55.059, K55.061, K55.062, K55.069, K55.1, K55.8, K55.9 |
| <b>Psychological Outcome Group</b>             |                                                                                                                                                                                                                                                                                                                                                                                                                                                                                                                                                                                                                                                                                            |
| <b>Insomnia</b>                                | 780.51, 780.52<br>G47.00                                                                                                                                                                                                                                                                                                                                                                                                                                                                                                                                                                                                                                                                   |
| <b>Adjustment Disorders</b>                    | 309.0, 309.1, 309.22, 309.23, 309.24, 309.28, 309.29, 309.3, 309.4, 309.82, 309.83, 309.89, 309.9                                                                                                                                                                                                                                                                                                                                                                                                                                                                                                                                                                                          |

|                                  |                                                                                                                                                                                                                                                                                                                                                                                                                                                                                                                                                                                                                                                                                                                                                                                                                                                                                                                                                                                                                                                                                       |
|----------------------------------|---------------------------------------------------------------------------------------------------------------------------------------------------------------------------------------------------------------------------------------------------------------------------------------------------------------------------------------------------------------------------------------------------------------------------------------------------------------------------------------------------------------------------------------------------------------------------------------------------------------------------------------------------------------------------------------------------------------------------------------------------------------------------------------------------------------------------------------------------------------------------------------------------------------------------------------------------------------------------------------------------------------------------------------------------------------------------------------|
|                                  | F43.20, F43.21, F43.22, F43.23, F43.24, F43.25,<br>F43.29, F43.8, F43.9                                                                                                                                                                                                                                                                                                                                                                                                                                                                                                                                                                                                                                                                                                                                                                                                                                                                                                                                                                                                               |
| <b>Anxiety Disorders</b>         | 293.84, 300.00, 300.01, 300.02, 300.09, 300.10,<br>300.20, 300.21, 300.22, 300.23, 300.29, 300.3, 300.5,<br>300.89, 300.9, 308.0, 308.1, 308.2, 308.3, 308.4,<br>308.9, 309.81, 313.0, 313.1, 313.21, 313.22, 313.3,<br>313.82, 313.83<br>F06.4, F40.00, F40.01, F40.02, F40.10, F40.11,<br>F40.210, F40.218, F40.220, F40.228, F40.230,<br>F40.231, F40.232, F40.233, F40.240, F40.241,<br>F40.242, F40.243, F40.248, F40.290, F40.291,<br>F40.298, F40.8, F40.9, F41.0, F41.1, F41.3, F41.8,<br>F41.9, F42., F42.2, F42.3, F42.4, F42.8, F42.9, F43.0,<br>F43.10, F43.11, F43.12, F48.8, F48.9, R45.2, R45.3,<br>R45.4, R45.5, R45.6, R45.7, R45.81, R45.82, R45.83,<br>R45.84                                                                                                                                                                                                                                                                                                                                                                                                      |
| <b>PTSD</b>                      | 309.81<br>F43.1                                                                                                                                                                                                                                                                                                                                                                                                                                                                                                                                                                                                                                                                                                                                                                                                                                                                                                                                                                                                                                                                       |
| <b>Impulse Control Disorders</b> | 312.30, 312.31, 312.32, 312.33, 312.34, 312.35,<br>312.39<br>F63.0, F63.1, F63.2, F63.3, F63.81, F63.89, F63.9,<br>R45.850                                                                                                                                                                                                                                                                                                                                                                                                                                                                                                                                                                                                                                                                                                                                                                                                                                                                                                                                                            |
| <b>Mood Disorders</b>            | 293.83, 296.00, 296.01, 296.02, 296.03, 296.04,<br>296.05, 296.06, 296.10, 296.11, 296.12, 296.13,<br>296.14, 296.15, 296.16, 296.20, 296.21, 296.22,<br>296.23, 296.24, 296.25, 296.26, 296.30, 296.31,<br>296.32, 296.33, 296.34, 296.35, 296.36, 296.40,<br>296.41, 296.42, 296.43, 296.44, 296.45, 296.46,<br>296.50, 296.51, 296.52, 296.53, 296.54, 296.55,<br>296.56, 296.60, 296.61, 296.62, 296.63, 296.64,<br>296.65, 296.66, 296.7, 296.80, 296.81, 296.82, 296.89,<br>296.90, 296.99, 300.4, 311<br>F06.30, F06.31, F06.32, F06.33, F06.34, F30.10,<br>F30.11, F30.12, F30.13, F30.2, F30.3, F30.4, F30.8,<br>F30.9, F31.0, F31.10, F31.11, F31.12, F31.13, F31.2,<br>F31.30, F31.31, F31.32, F31.4, F31.5, F31.60, F31.61,<br>F31.62, F31.63, F31.64, F31.70, F31.71, F31.72,<br>F31.73, F31.74, F31.75, F31.76, F31.77, F31.78,<br>F31.81, F31.89, F31.9, F32.0, F32.1, F32.2, F32.3,<br>F32.4, F32.5, F32.8, F32.81, F32.89, F32.9, F33.0,<br>F33.1, F33.2, F33.3, F33.40, F33.41, F33.42, F33.8,<br>F33.9, F34.0, F34.1, F34.8, F34.81, F34.89, F34.9,<br>F39, R45.86 |
| <b>Personality Disorders</b>     | 301.0, 301.10, 301.11, 301.12, 301.13, 301.20, 301.21,<br>301.22, 301.3, 301.4, 301.50, 301.51, 301.59, 301.6,<br>301.7, 301.81, 301.82, 301.83, 301.84, 301.89, 301.9                                                                                                                                                                                                                                                                                                                                                                                                                                                                                                                                                                                                                                                                                                                                                                                                                                                                                                                |

**Alcohol-Related Disorders**

F60.0, F60.1, F60.2, F60.3, F60.4, F60.5, F60.6, F60.7, F60.81, F60.89, F60.9, F69  
291.0, 291.1, 291.2, 291.3, 291.4, 291.5, 291.8, 291.81, 291.82, 291.89, 291.9, 303.00, 303.01, 303.02, 303.03, 303.90, 303.91, 303.92, 303.93, 305.00, 305.01, 305.02, 305.03, 357.5, 425.5, 535.3, 535.30, 535.31, 571.0, 571.1, 571.2, 571.3, 760.71, 980.0  
F10.10, F10.11, F10.120, F10.121, F10.129, F10.14, F10.150, F10.151, F10.159, F10.180, F10.181, F10.182, F10.188, F10.19, F10.20, F10.21, F10.220, F10.221, F10.229, F10.230, F10.231, F10.232, F10.239, F10.24, F10.250, F10.251, F10.259, F10.26, F10.27, F10.280, F10.281, F10.282, F10.288, F10.29, F10.920, F10.921, F10.929, F10.94, F10.950, F10.951, F10.959, F10.96, F10.97, F10.980, F10.981, F10.982, F10.988, F10.99, G62.1, I42.6, K29.20, K29.21, K70.0, K70.10, K70.11, K70.2, K70.30, K70.31, K70.40, K70.9, O99.310, O99.311, O99.312, O99.313, O99.314, O99.315, P04.3, Q86.0

**Substance-Related Disorders**

292.0, 292.11, 292.12, 292.2, 292.81, 292.82, 292.83, 292.84, 292.85, 292.89, 292.9, 304.00, 304.01, 304.02, 304.03, 304.10, 304.11, 304.12, 304.13, 304.20, 304.21, 304.22, 304.23, 304.30, 304.31, 304.32, 304.33, 304.40, 304.41, 304.42, 304.43, 304.50, 304.51, 304.52, 304.53, 304.60, 304.61, 304.62, 304.63, 304.70, 304.71, 304.72, 304.73, 304.80, 304.81, 304.82, 304.83, 304.90, 304.91, 304.92, 304.93, 305.20, 305.21, 305.22, 305.23, 305.30, 305.31, 305.32, 305.33, 305.40, 305.41, 305.42, 305.43, 305.50, 305.51, 305.52, 305.53, 305.60, 305.61, 305.62, 305.63, 305.70, 305.71, 305.72, 305.73, 305.80, 305.81, 305.82, 305.83, 305.90, 305.91, 305.92, 305.93, 648.30, 648.31, 648.32, 648.33, 648.34, 655.50, 655.51, 655.53, 760.72, 760.73, 760.75, 779.5, 965.00, 965.01, 965.02, 965.09, V65.42  
F11.10, F11.11, F11.120, F11.121, F11.122, F11.129, F11.14, F11.150, F11.151, F11.159, F11.181, F11.182, F11.188, F11.19, F11.20, F11.21, F11.220, F11.221, F11.222, F11.229, F11.23, F11.24, F11.250, F11.251, F11.259, F11.281, F11.282, F11.288, F11.29, F11.90,

F11.920, F11.921, F11.922, F11.929, F11.93, F11.94,  
F11.950, F11.951, F11.959, F11.981, F11.982,  
F11.988, F11.99, F12.10, F12.11, F12.120, F12.121,  
F12.122, F12.129, F12.150, F12.151, F12.159,  
F12.180, F12.188, F12.19, F12.20, F12.21, F12.220,  
F12.221, F12.222, F12.229, F12.23, F12.250, F12.251,  
F12.259, F12.280, F12.288, F12.29, F12.90, F12.920,  
F12.921, F12.922, F12.929, F12.93, F12.950, F12.951,  
F12.959, F12.980, F12.988, F12.99, F13.10, F13.11,  
F13.120, F13.121, F13.129, F13.14, F13.150, F13.151,  
F13.159, F13.180, F13.181, F13.182, F13.188, F13.19,  
F13.20, F13.21, F13.220, F13.221, F13.229, F13.230,  
F13.231, F13.232, F13.239, F13.24, F13.250, F13.251,  
F13.259, F13.26, F13.27, F13.280, F13.281, F13.282,  
F13.288, F13.29, F13.90, F13.920, F13.921, F13.929,  
F13.930, F13.931, F13.932, F13.939, F13.94, F13.950,  
F13.951, F13.959, F13.96, F13.97, F13.980, F13.981,  
F13.982, F13.988, F13.99, F14.10, F14.11, F14.120,  
F14.121, F14.122, F14.129, F14.14, F14.150, F14.151,  
F14.159, F14.180, F14.181, F14.182, F14.188, F14.19,  
F14.20, F14.21, F14.220, F14.221, F14.222, F14.229,  
F14.23, F14.24, F14.250, F14.251, F14.259, F14.280,  
F14.281, F14.282, F14.288, F14.29, F14.90, F14.920,  
F14.921, F14.922, F14.929, F14.94, F14.950, F14.951,  
F14.959, F14.980, F14.981, F14.982, F14.988, F14.99,  
F15.10, F15.11, F15.120, F15.121, F15.122, F15.129,  
F15.14, F15.150, F15.151, F15.159, F15.180, F15.181,  
F15.182, F15.188, F15.19, F15.20, F15.21, F15.220,  
F15.221, F15.222, F15.229, F15.23, F15.24, F15.250,  
F15.251, F15.259, F15.280, F15.281, F15.282,  
F15.288, F15.29, F15.90, F15.920, F15.921, F15.922,  
F15.929, F15.93, F15.94, F15.950, F15.951, F15.959,  
F15.980, F15.981, F15.982, F15.988, F15.99, F16.10,  
F16.11, F16.120, F16.121, F16.122, F16.129, F16.14,  
F16.150, F16.151, F16.159, F16.180, F16.183,  
F16.188, F16.19, F16.20, F16.21, F16.220, F16.221,  
F16.229, F16.24, F16.250, F16.251, F16.259, F16.280,  
F16.283, F16.288, F16.29, F16.90, F16.920, F16.921,  
F16.929, F16.94, F16.950, F16.951, F16.959, F16.980,  
F16.983, F16.988, F16.99, F17.200, F17.201, F17.203,  
F17.208, F17.209, F17.210, F17.211, F17.213,  
F17.218, F17.219, F17.220, F17.221, F17.223,  
F17.228, F17.229, F17.290, F17.291, F17.293,  
F17.298, F17.299, F18.10, F18.11, F18.120, F18.121,  
F18.129, F18.14, F18.150, F18.151, F18.159, F18.17,  
F18.180, F18.188, F18.19, F18.20, F18.21, F18.220,



F18.221, F18.229, F18.24, F18.250, F18.251, F18.259, F18.27, F18.280, F18.288, F18.29, F18.90, F18.920, F18.921, F18.929, F18.94, F18.950, F18.951, F18.959, F18.97, F18.980, F18.988, F18.99, F19.10, F19.11, F19.120, F19.121, F19.122, F19.129, F19.14, F19.150, F19.151, F19.159, F19.16, F19.17, F19.180, F19.181, F19.182, F19.188, F19.19, F19.20, F19.21, F19.220, F19.221, F19.222, F19.229, F19.230, F19.231, F19.232, F19.239, F19.24, F19.250, F19.251, F19.259, F19.26, F19.27, F19.280, F19.281, F19.282, F19.288, F19.29, F19.90, F19.920, F19.921, F19.922, F19.929, F19.930, F19.931, F19.932, F19.939, F19.94, F19.950, F19.951, F19.959, F19.96, F19.97, F19.980, F19.981, F19.982, F19.988, F19.99, F55.0, F55.1, F55.2, F55.3, F55.4, F55.8, O35.5XX0, O35.5XX1, O35.5XX2, O35.5XX3, O35.5XX4, O35.5XX5, O35.5XX9, O99.320, O99.321, O99.322, O99.323, O99.324, O99.325, P04.41, P04.49, P96.1, P96.2, T40.0X1A, T40.0X1D, T40.0X1S, T40.0X3A, T40.0X3D, T40.0X3S, T40.0X4A, T40.0X4D, T40.0X4S, T40.0X5A, T40.0X5D, T40.0X5S, T40.0X6A, T40.0X6D, T40.0X6S, T40.1X1A, T40.1X1D, T40.1X1S, T40.1X3A, T40.1X3D, T40.1X3S, T40.1X4A, T40.1X4D, T40.1X4S, T40.1X5A, T40.1X5D, T40.1X5S, T40.5X1A, T40.5X1D, T40.5X1S, T40.5X3A, T40.5X3D, T40.5X3S, T40.5X4A, T40.5X4D, T40.5X4S, T40.5X5A, T40.5X5D, T40.5X5S, T40.5X6A, T40.5X6D, T40.5X6S, T40.7X1A, T40.7X1D, T40.7X1S, T40.7X3A, T40.7X3D, T40.7X3S, T40.7X4A, T40.7X4D, T40.7X4S, T40.7X5A, T40.7X5D, T40.7X5S, T40.7X6A, T40.7X6D, T40.7X6S, T40.8X1A, T40.8X1D, T40.8X1S, T40.8X3A, T40.8X3D, T40.8X3S, T40.8X4A, T40.8X4D, T40.8X4S, T40.8X5A, T40.8X5D, T40.8X5S, T40.901A, T40.901D, T40.901S, T40.903A, T40.903D, T40.903S, T40.904A, T40.904D, T40.904S, T40.905A, T40.905D, T40.905S, T40.906A, T40.906D, T40.906S, T40.991A, T40.991D, T40.991S, T40.993A, T40.993D, T40.993S, T40.994A, T40.994D, T40.994S, T40.995A, T40.995D, T40.995S, T40.996A, T40.996D, T40.996S

**Central Pain** 338.0, 338.11, 338.12, 338.18, 338.19, 338.21, 338.22, 338.28, 338.29, 338.3, 338.4

G89.0, G89.11, G89.12, G89.18, G89.21, G89.22, G89.28, G89.29, G89.3, G89.4

**Musculoskeletal  
Conditions**

**Rheumatoid arthritis and related  
disease**

714.0, 714.1, 714.2, 714.30, 714.31, 714.32, 714.33, 714.4,  
714.81, 714.89, 714.9, 720.0  
M05.00, M05.011, M05.012, M05.019, M05.021, M05.022,  
M05.029, M05.031, M05.032, M05.039, M05.041, M05.042,  
M05.049, M05.051, M05.052, M05.059, M05.061, M05.062,  
M05.069, M05.071, M05.072, M05.079, M05.09, M05.10,  
M05.111, M05.112, M05.119, M05.121, M05.122, M05.129,  
M05.131, M05.132, M05.139, M05.141, M05.142, M05.149,  
M05.151, M05.152, M05.159, M05.161, M05.162, M05.169,  
M05.171, M05.172, M05.179, M05.19, M05.20, M05.211,  
M05.212, M05.219, M05.221, M05.222, M05.229, M05.231,  
M05.232, M05.239, M05.241, M05.242, M05.249, M05.251,  
M05.252, M05.259, M05.261, M05.262, M05.269, M05.271,  
M05.272, M05.279, M05.29, M05.30, M05.311, M05.312,  
M05.319, M05.321, M05.322, M05.329, M05.331, M05.332,  
M05.339, M05.341, M05.342, M05.349, M05.351, M05.352,  
M05.359, M05.361, M05.362, M05.369, M05.371, M05.372,  
M05.379, M05.39, M05.40, M05.411, M05.412, M05.419,  
M05.421, M05.422, M05.429, M05.431, M05.432, M05.439,  
M05.441, M05.442, M05.449, M05.451, M05.452, M05.459,  
M05.461, M05.462, M05.469, M05.471, M05.472, M05.479,  
M05.49, M05.50, M05.511, M05.512, M05.519, M05.521,  
M05.522, M05.529, M05.531, M05.532, M05.539, M05.541,  
M05.542, M05.549, M05.551, M05.552, M05.559, M05.561,  
M05.562, M05.569, M05.571, M05.572, M05.579, M05.59,  
M05.60, M05.611, M05.612, M05.619, M05.621, M05.622,  
M05.629, M05.631, M05.632, M05.639, M05.641, M05.642,  
M05.649, M05.651, M05.652, M05.659, M05.661, M05.662,  
M05.669, M05.671, M05.672, M05.679, M05.69, M05.70,  
M05.711, M05.712, M05.719, M05.721, M05.722, M05.729,  
M05.731, M05.732, M05.739, M05.741, M05.742, M05.749,  
M05.751, M05.752, M05.759, M05.761, M05.762, M05.769,  
M05.771, M05.772, M05.779, M05.79, M05.80, M05.811,  
M05.812, M05.819, M05.821, M05.822, M05.829, M05.831,  
M05.832, M05.839, M05.841, M05.842, M05.849, M05.851,  
M05.852, M05.859, M05.861, M05.862, M05.869, M05.871,  
M05.872, M05.879, M05.89, M05.9, M06.00, M06.011,  
M06.012, M06.019, M06.021, M06.022, M06.029, M06.031,  
M06.032, M06.039, M06.041, M06.042, M06.049, M06.051,  
M06.052, M06.059, M06.061, M06.062, M06.069, M06.071,  
M06.072, M06.079, M06.08, M06.09, M06.1, M06.20,  
M06.211, M06.212, M06.219, M06.221, M06.222, M06.229,  
M06.231, M06.232, M06.239, M06.241, M06.242, M06.249,  
M06.251, M06.252, M06.259, M06.261, M06.262, M06.269,

M06.271, M06.272, M06.279, M06.28, M06.29, M06.30, M06.311, M06.312, M06.319, M06.321, M06.322, M06.329, M06.331, M06.332, M06.339, M06.341, M06.342, M06.349, M06.351, M06.352, M06.359, M06.361, M06.362, M06.369, M06.371, M06.372, M06.379, M06.38, M06.39, M06.4, M06.80, M06.811, M06.812, M06.819, M06.821, M06.822, M06.829, M06.831, M06.832, M06.839, M06.841, M06.842, M06.849, M06.851, M06.852, M06.859, M06.861, M06.862, M06.869, M06.871, M06.872, M06.879, M06.88, M06.89, M06.9, M08.00, M08.011, M08.012, M08.019, M08.021, M08.022, M08.029, M08.031, M08.032, M08.039, M08.041, M08.042, M08.049, M08.051, M08.052, M08.059, M08.061, M08.062, M08.069, M08.071, M08.072, M08.079, M08.08, M08.09, M08.1, M08.20, M08.211, M08.212, M08.219, M08.221, M08.222, M08.229, M08.231, M08.232, M08.239, M08.241, M08.242, M08.249, M08.251, M08.252, M08.259, M08.261, M08.262, M08.269, M08.271, M08.272, M08.279, M08.28, M08.29, M08.3, M08.40, M08.411, M08.412, M08.419, M08.421, M08.422, M08.429, M08.431, M08.432, M08.439, M08.441, M08.442, M08.449, M08.451, M08.452, M08.459, M08.461, M08.462, M08.469, M08.471, M08.472, M08.479, M08.48, M08.80, M08.811, M08.812, M08.819, M08.821, M08.822, M08.829, M08.831, M08.832, M08.839, M08.841, M08.842, M08.849, M08.851, M08.852, M08.859, M08.861, M08.862, M08.869, M08.871, M08.872, M08.879, M08.88, M08.89, M08.90, M08.911, M08.912, M08.919, M08.921, M08.922, M08.929, M08.931, M08.932, M08.939, M08.941, M08.942, M08.949, M08.951, M08.952, M08.959, M08.961, M08.962, M08.969, M08.971, M08.972, M08.979, M08.98, M08.99, M12.00, M12.011, M12.012, M12.019, M12.021, M12.022, M12.029, M12.031, M12.032, M12.039, M12.041, M12.042, M12.049, M12.051, M12.052, M12.059, M12.061, M12.062, M12.069, M12.071, M12.072, M12.079, M12.08, M12.09, M45.0, M45.1, M45.2, M45.3, M45.4, M45.5, M45.6, M45.7, M45.8, M45.9, M48.8X1, M48.8X2, M48.8X3, M48.8X4, M48.8X5, M48.8X6, M48.8X7, M48.8X8, M48.8X9

**Osteoarthritis**

715.00, 715.04, 715.09, 715.10, 715.11, 715.12, 715.13, 715.14, 715.15, 715.16, 715.17, 715.18, 715.20, 715.21, 715.22, 715.23, 715.24, 715.25, 715.26, 715.27, 715.28, 715.30, 715.31, 715.32, 715.33, 715.34, 715.35, 715.36, 715.37, 715.38, 715.80, 715.89, 715.90, 715.91, 715.92, 715.93, 715.94, 715.95, 715.96, 715.97, 715.98, V13.4 M15.0, M15.1, M15.2, M15.3, M15.4, M15.8, M15.9, M16.0, M16.10, M16.11, M16.12, M16.2, M16.30, M16.31, M16.32, M16.4, M16.50, M16.51, M16.52, M16.6, M16.7, M16.9,

M17.0, M17.10, M17.11, M17.12, M17.2, M17.30, M17.31, M17.32, M17.4, M17.5, M17.9, M18.0, M18.10, M18.11, M18.12, M18.2, M18.30, M18.31, M18.32, M18.4, M18.50, M18.51, M18.52, M18.9, M19.011, M19.012, M19.019, M19.021, M19.022, M19.029, M19.031, M19.032, M19.039, M19.041, M19.042, M19.049, M19.071, M19.072, M19.079, M19.111, M19.112, M19.119, M19.121, M19.122, M19.129, M19.131, M19.132, M19.139, M19.141, M19.142, M19.149, M19.171, M19.172, M19.179, M19.211, M19.212, M19.219, M19.221, M19.222, M19.229, M19.231, M19.232, M19.239, M19.241, M19.242, M19.249, M19.271, M19.272, M19.279, M19.90, M19.91, M19.92, M19.93

**Pathological fracture**

733.1, 733.10, 733.11, 733.12, 733.13, 733.14, 733.15, 733.16, 733.19, 733.93, 733.94, 733.95, 733.96, 733.97, 733.98, V13.51

M80.00XA, M80.00XD, M80.00XG, M80.00XK, M80.00XP, M80.00XS, M80.011A, M80.011D, M80.011G, M80.011K, M80.011P, M80.011S, M80.012A, M80.012D, M80.012G, M80.012K, M80.012P, M80.012S, M80.019A, M80.019D, M80.019G, M80.019K, M80.019P, M80.019S, M80.021A, M80.021D, M80.021G, M80.021K, M80.021P, M80.021S, M80.022A, M80.022D, M80.022G, M80.022K, M80.022P, M80.022S, M80.029A, M80.029D, M80.029G, M80.029K, M80.029P, M80.029S, M80.031A, M80.031D, M80.031G, M80.031K, M80.031P, M80.031S, M80.032A, M80.032D, M80.032G, M80.032K, M80.032P, M80.032S, M80.039A, M80.039D, M80.039G, M80.039K, M80.039P, M80.039S, M80.041A, M80.041D, M80.041G, M80.041K, M80.041P, M80.041S, M80.042A, M80.042D, M80.042G, M80.042K, M80.042P, M80.042S, M80.049A, M80.049D, M80.049G, M80.049K, M80.049P, M80.049S, M80.051A, M80.051D, M80.051G, M80.051K, M80.051P, M80.051S, M80.052A, M80.052D, M80.052G, M80.052K, M80.052P, M80.052S, M80.059A, M80.059D, M80.059G, M80.059K, M80.059P, M80.059S, M80.061A, M80.061D, M80.061G, M80.061K, M80.061P, M80.061S, M80.062A, M80.062D, M80.062G, M80.062K, M80.062P, M80.062S, M80.069A, M80.069D, M80.069G, M80.069K, M80.069P, M80.069S, M80.071A, M80.071D, M80.071G, M80.071K, M80.071P, M80.071S, M80.072A, M80.072D, M80.072G, M80.072K, M80.072P, M80.072S, M80.079A, M80.079D, M80.079G, M80.079K, M80.079P, M80.079S, M80.08XA, M80.08XD, M80.08XG, M80.08XK, M80.08XP, M80.08XS, M80.80XA, M80.80XD, M80.80XG, M80.80XK, M80.80XP, M80.80XS, M80.811A, M80.811D, M80.811G, M80.811K, M80.811P, M80.811S, M80.812A, M80.812D, M80.812G, M80.812K,

M80.812P, M80.812S, M80.819A, M80.819D, M80.819G, M80.819K, M80.819P, M80.819S, M80.821A, M80.821D, M80.821G, M80.821K, M80.821P, M80.821S, M80.822A, M80.822D, M80.822G, M80.822K, M80.822P, M80.822S, M80.829A, M80.829D, M80.829G, M80.829K, M80.829P, M80.829S, M80.831A, M80.831D, M80.831G, M80.831K, M80.831P, M80.831S, M80.832A, M80.832D, M80.832G, M80.832K, M80.832P, M80.832S, M80.839A, M80.839D, M80.839G, M80.839K, M80.839P, M80.839S, M80.841A, M80.841D, M80.841G, M80.841K, M80.841P, M80.841S, M80.842A, M80.842D, M80.842G, M80.842K, M80.842P, M80.842S, M80.849A, M80.849D, M80.849G, M80.849K, M80.849P, M80.849S, M80.851A, M80.851D, M80.851G, M80.851K, M80.851P, M80.851S, M80.852A, M80.852D, M80.852G, M80.852K, M80.852P, M80.852S, M80.859A, M80.859D, M80.859G, M80.859K, M80.859P, M80.859S, M80.861A, M80.861D, M80.861G, M80.861K, M80.861P, M80.861S, M80.862A, M80.862D, M80.862G, M80.862K, M80.862P, M80.862S, M80.869A, M80.869D, M80.869G, M80.869K, M80.869P, M80.869S, M80.871A, M80.871D, M80.871G, M80.871K, M80.871P, M80.871S, M80.872A, M80.872D, M80.872G, M80.872K, M80.872P, M80.872S, M80.879A, M80.879D, M80.879G, M80.879K, M80.879P, M80.879S, M80.88XA, M80.88XD, M80.88XG, M80.88XK, M80.88XP, M80.88XS, M84.40XA, M84.40XD, M84.40XG, M84.40XK, M84.40XP, M84.40XS, M84.411A, M84.411D, M84.411G, M84.411K, M84.411P, M84.411S, M84.412A, M84.412D, M84.412G, M84.412K, M84.412P, M84.412S, M84.419A, M84.419D, M84.419G, M84.419K, M84.419P, M84.419S, M84.421A, M84.421D, M84.421G, M84.421K, M84.421P, M84.421S, M84.422A, M84.422D, M84.422G, M84.422K, M84.422P, M84.422S, M84.429A, M84.429D, M84.429G, M84.429K, M84.429P, M84.429S, M84.431A, M84.431D, M84.431G, M84.431K, M84.431P, M84.431S, M84.432A, M84.432D, M84.432G, M84.432K, M84.432P, M84.432S, M84.433A, M84.433D, M84.433G, M84.433K, M84.433P, M84.433S, M84.434A, M84.434D, M84.434G, M84.434K, M84.434P, M84.434S, M84.439A, M84.439D, M84.439G, M84.439K, M84.439P, M84.439S, M84.441A, M84.441D, M84.441G, M84.441K, M84.441P, M84.441S, M84.442A, M84.442D, M84.442G, M84.442K, M84.442P, M84.442S, M84.443A, M84.443D, M84.443G, M84.443K, M84.443P, M84.443S, M84.444A, M84.444D, M84.444G, M84.444K, M84.444P, M84.444S, M84.445A, M84.445D, M84.445G, M84.445K, M84.445P, M84.445S, M84.446A, M84.446D, M84.446G, M84.446K, M84.446P, M84.446S,

M84.451A, M84.451D, M84.451G, M84.451K, M84.451P,  
M84.451S, M84.452A, M84.452D, M84.452G, M84.452K,  
M84.452P, M84.452S, M84.453A, M84.453D, M84.453G,  
M84.453K, M84.453P, M84.453S, M84.454A, M84.454D,  
M84.454G, M84.454K, M84.454P, M84.454S, M84.459A,  
M84.459D, M84.459G, M84.459K, M84.459P, M84.459S,  
M84.461A, M84.461D, M84.461G, M84.461K, M84.461P,  
M84.461S, M84.462A, M84.462D, M84.462G, M84.462K,  
M84.462P, M84.462S, M84.463A, M84.463D, M84.463G,  
M84.463K, M84.463P, M84.463S, M84.464A, M84.464D,  
M84.464G, M84.464K, M84.464P, M84.464S, M84.469A,  
M84.469D, M84.469G, M84.469K, M84.469P, M84.469S,  
M84.471A, M84.471D, M84.471G, M84.471K, M84.471P,  
M84.471S, M84.472A, M84.472D, M84.472G, M84.472K,  
M84.472P, M84.472S, M84.473A, M84.473D, M84.473G,  
M84.473K, M84.473P, M84.473S, M84.474A, M84.474D,  
M84.474G, M84.474K, M84.474P, M84.474S, M84.475A,  
M84.475D, M84.475G, M84.475K, M84.475P, M84.475S,  
M84.476A, M84.476D, M84.476G, M84.476K, M84.476P,  
M84.476S, M84.477A, M84.477D, M84.477G, M84.477K,  
M84.477P, M84.477S, M84.478A, M84.478D, M84.478G,  
M84.478K, M84.478P, M84.478S, M84.479A, M84.479D,  
M84.479G, M84.479K, M84.479P, M84.479S, M84.48XA,  
M84.48XD, M84.48XG, M84.48XK, M84.48XP, M84.48XS,  
M84.50XA, M84.50XD, M84.50XG, M84.50XK,  
M84.50XP, M84.50XS, M84.511A, M84.511D, M84.511G,  
M84.511K, M84.511P, M84.511S, M84.512A, M84.512D,  
M84.512G, M84.512K, M84.512P, M84.512S, M84.519A,  
M84.519D, M84.519G, M84.519K, M84.519P, M84.519S,  
M84.521A, M84.521D, M84.521G, M84.521K, M84.521P,  
M84.521S, M84.522A, M84.522D, M84.522G, M84.522K,  
M84.522P, M84.522S, M84.529A, M84.529D, M84.529G,  
M84.529K, M84.529P, M84.529S, M84.531A, M84.531D,  
M84.531G, M84.531K, M84.531P, M84.531S, M84.532A,  
M84.532D, M84.532G, M84.532K, M84.532P, M84.532S,  
M84.533A, M84.533D, M84.533G, M84.533K, M84.533P,  
M84.533S, M84.534A, M84.534D, M84.534G, M84.534K,  
M84.534P, M84.534S, M84.539A, M84.539D, M84.539G,  
M84.539K, M84.539P, M84.539S, M84.541A, M84.541D,  
M84.541G, M84.541K, M84.541P, M84.541S, M84.542A,  
M84.542D, M84.542G, M84.542K, M84.542P, M84.542S,  
M84.549A, M84.549D, M84.549G, M84.549K, M84.549P,  
M84.549S, M84.550A, M84.550D, M84.550G, M84.550K,  
M84.550P, M84.550S, M84.551A, M84.551D, M84.551G,  
M84.551K, M84.551P, M84.551S, M84.552A, M84.552D,  
M84.552G, M84.552K, M84.552P, M84.552S, M84.553A,

M84.553D, M84.553G, M84.553K, M84.553P, M84.553S,  
M84.559A, M84.559D, M84.559G, M84.559K, M84.559P,  
M84.559S, M84.561A, M84.561D, M84.561G, M84.561K,  
M84.561P, M84.561S, M84.562A, M84.562D, M84.562G,  
M84.562K, M84.562P, M84.562S, M84.563A, M84.563D,  
M84.563G, M84.563K, M84.563P, M84.563S, M84.564A,  
M84.564D, M84.564G, M84.564K, M84.564P, M84.564S,  
M84.569A, M84.569D, M84.569G, M84.569K, M84.569P,  
M84.569S, M84.571A, M84.571D, M84.571G, M84.571K,  
M84.571P, M84.571S, M84.572A, M84.572D, M84.572G,  
M84.572K, M84.572P, M84.572S, M84.573A, M84.573D,  
M84.573G, M84.573K, M84.573P, M84.573S, M84.574A,  
M84.574D, M84.574G, M84.574K, M84.574P, M84.574S,  
M84.575A, M84.575D, M84.575G, M84.575K, M84.575P,  
M84.575S, M84.576A, M84.576D, M84.576G, M84.576K,  
M84.576P, M84.576S, M84.58XA, M84.58XD, M84.58XG,  
M84.58XK, M84.58XP, M84.58XS, M84.60XA, M84.60XD,  
M84.60XG, M84.60XK, M84.60XP, M84.60XS, M84.611A,  
M84.611D, M84.611G, M84.611K, M84.611P, M84.611S,  
M84.612A, M84.612D, M84.612G, M84.612K, M84.612P,  
M84.612S, M84.619A, M84.619D, M84.619G, M84.619K,  
M84.619P, M84.619S, M84.621A, M84.621D, M84.621G,  
M84.621K, M84.621P, M84.621S, M84.622A, M84.622D,  
M84.622G, M84.622K, M84.622P, M84.622S, M84.629A,  
M84.629D, M84.629G, M84.629K, M84.629P, M84.629S,  
M84.631A, M84.631D, M84.631G, M84.631K, M84.631P,  
M84.631S, M84.632A, M84.632D, M84.632G, M84.632K,  
M84.632P, M84.632S, M84.633A, M84.633D, M84.633G,  
M84.633K, M84.633P, M84.633S, M84.634A, M84.634D,  
M84.634G, M84.634K, M84.634P, M84.634S, M84.639A,  
M84.639D, M84.639G, M84.639K, M84.639P, M84.639S,  
M84.641A, M84.641D, M84.641G, M84.641K, M84.641P,  
M84.641S, M84.642A, M84.642D, M84.642G, M84.642K,  
M84.642P, M84.642S, M84.649A, M84.649D, M84.649G,  
M84.649K, M84.649P, M84.649S, M84.650A, M84.650D,  
M84.650G, M84.650K, M84.650P, M84.650S, M84.651A,  
M84.651D, M84.651G, M84.651K, M84.651P, M84.651S,  
M84.652A, M84.652D, M84.652G, M84.652K, M84.652P,  
M84.652S, M84.653A, M84.653D, M84.653G, M84.653K,  
M84.653P, M84.653S, M84.659A, M84.659D, M84.659G,  
M84.659K, M84.659P, M84.659S, M84.661A, M84.661D,  
M84.661G, M84.661K, M84.661P, M84.661S, M84.662A,  
M84.662D, M84.662G, M84.662K, M84.662P, M84.662S,  
M84.663A, M84.663D, M84.663G, M84.663K, M84.663P,  
M84.663S, M84.664A, M84.664D, M84.664G, M84.664K,  
M84.664P, M84.664S, M84.669A, M84.669D, M84.669G,

M84.669K, M84.669P, M84.669S, M84.671A, M84.671D,  
M84.671G, M84.671K, M84.671P, M84.671S, M84.672A,  
M84.672D, M84.672G, M84.672K, M84.672P, M84.672S,  
M84.673A, M84.673D, M84.673G, M84.673K, M84.673P,  
M84.673S, M84.674A, M84.674D, M84.674G, M84.674K,  
M84.674P, M84.674S, M84.675A, M84.675D, M84.675G,  
M84.675K, M84.675P, M84.675S, M84.676A, M84.676D,  
M84.676G, M84.676K, M84.676P, M84.676S, M84.68XA,  
M84.68XD, M84.68XG, M84.68XK, M84.68XP, M84.68XS,  
Z87.310, Z87.311

**Other connective tissue disease**

327.52, 567.31, 710.5, 725, 726.0, 726.10, 726.11, 726.12,  
726.13, 726.19, 726.2, 726.30, 726.31, 726.32, 726.33,  
726.39, 726.4, 726.5, 726.60, 726.61, 726.62, 726.63, 726.64,  
726.65, 726.69, 726.70, 726.71, 726.72, 726.73, 726.79,  
726.8, 726.90, 726.91, 727.00, 727.01, 727.02, 727.03,  
727.04, 727.05, 727.06, 727.09, 727.2, 727.3, 727.40, 727.41,  
727.42, 727.43, 727.49, 727.50, 727.51, 727.59, 727.60,  
727.61, 727.62, 727.63, 727.64, 727.65, 727.66, 727.67,  
727.68, 727.69, 727.81, 727.82, 727.83, 727.89, 727.9, 728.0,  
728.10, 728.11, 728.12, 728.13, 728.19, 728.2, 728.3, 728.4,  
728.5, 728.6, 728.71, 728.79, 728.81, 728.82, 728.83, 728.84,  
728.85, 728.86, 728.87, 728.88, 728.89, 728.9, 729.0, 729.1,  
729.2, 729.30, 729.31, 729.39, 729.4, 729.5, 729.6, 729.71,  
729.72, 729.73, 729.79, 729.81, 729.82, 729.89, 729.9,  
729.90, 729.91, 729.92, 729.99, 781.9, 781.91, 781.92,  
781.94, 781.99, 793.7, V13.5, V13.59, V43.6, V43.60,  
V43.61, V43.62, V43.63, V43.64, V43.65, V43.66, V43.69,  
V43.7, V45.4, V48.1, V48.2, V48.3, V49.0, V49.1, V49.2,  
V49.5, V49.60, V49.61, V49.62, V49.63, V49.64, V49.65,  
V49.66, V49.67, V49.70, V49.71, V49.72, V49.73, V49.74,  
V49.75, V49.76, V49.77, V53.7  
G47.62, K68.12, M24.20, M24.211, M24.212, M24.219,  
M24.221, M24.222, M24.229, M24.231, M24.232, M24.239,  
M24.241, M24.242, M24.249, M24.251, M24.252, M24.259,  
M24.271, M24.272, M24.273, M24.274, M24.275, M24.276,  
M24.28, M35.2, M35.3, M35.4, M35.6, M35.7, M35.8,  
M60.000, M60.001, M60.002, M60.003, M60.004, M60.005,  
M60.009, M60.011, M60.012, M60.019, M60.021, M60.022,  
M60.029, M60.031, M60.032, M60.039, M60.041, M60.042,  
M60.043, M60.044, M60.045, M60.046, M60.051, M60.052,  
M60.059, M60.061, M60.062, M60.069, M60.070, M60.071,  
M60.072, M60.073, M60.074, M60.075, M60.076, M60.077,  
M60.078, M60.08, M60.09, M60.10, M60.111, M60.112,  
M60.119, M60.121, M60.122, M60.129, M60.131, M60.132,  
M60.139, M60.141, M60.142, M60.149, M60.151, M60.152,  
M60.159, M60.161, M60.162, M60.169, M60.171, M60.172,



M60.179, M60.18, M60.19, M60.20, M60.211, M60.212, M60.219, M60.221, M60.222, M60.229, M60.231, M60.232, M60.239, M60.241, M60.242, M60.249, M60.251, M60.252, M60.259, M60.261, M60.262, M60.269, M60.271, M60.272, M60.279, M60.28, M60.80, M60.811, M60.812, M60.819, M60.821, M60.822, M60.829, M60.831, M60.832, M60.839, M60.841, M60.842, M60.849, M60.851, M60.852, M60.859, M60.861, M60.862, M60.869, M60.871, M60.872, M60.879, M60.88, M60.89, M60.9, M61.00, M61.011, M61.012, M61.019, M61.021, M61.022, M61.029, M61.031, M61.032, M61.039, M61.041, M61.042, M61.049, M61.051, M61.052, M61.059, M61.061, M61.062, M61.069, M61.071, M61.072, M61.079, M61.08, M61.09, M61.10, M61.111, M61.112, M61.119, M61.121, M61.122, M61.129, M61.131, M61.132, M61.139, M61.141, M61.142, M61.143, M61.144, M61.145, M61.146, M61.151, M61.152, M61.159, M61.161, M61.162, M61.169, M61.171, M61.172, M61.173, M61.174, M61.175, M61.176, M61.177, M61.178, M61.179, M61.18, M61.19, M61.20, M61.211, M61.212, M61.219, M61.221, M61.222, M61.229, M61.231, M61.232, M61.239, M61.241, M61.242, M61.249, M61.251, M61.252, M61.259, M61.261, M61.262, M61.269, M61.271, M61.272, M61.279, M61.28, M61.29, M61.30, M61.311, M61.312, M61.319, M61.321, M61.322, M61.329, M61.331, M61.332, M61.339, M61.341, M61.342, M61.349, M61.351, M61.352, M61.359, M61.361, M61.362, M61.369, M61.371, M61.372, M61.379, M61.38, M61.39, M61.40, M61.411, M61.412, M61.419, M61.421, M61.422, M61.429, M61.431, M61.432, M61.439, M61.441, M61.442, M61.449, M61.451, M61.452, M61.459, M61.461, M61.462, M61.469, M61.471, M61.472, M61.479, M61.48, M61.49, M61.50, M61.511, M61.512, M61.519, M61.521, M61.522, M61.529, M61.531, M61.532, M61.539, M61.541, M61.542, M61.549, M61.551, M61.552, M61.559, M61.561, M61.562, M61.569, M61.571, M61.572, M61.579, M61.58, M61.59, M61.9, M62.00, M62.011, M62.012, M62.019, M62.021, M62.022, M62.029, M62.031, M62.032, M62.039, M62.041, M62.042, M62.049, M62.051, M62.052, M62.059, M62.061, M62.062, M62.069, M62.071, M62.072, M62.079, M62.08, M62.10, M62.111, M62.112, M62.119, M62.121, M62.122, M62.129, M62.131, M62.132, M62.139, M62.141, M62.142, M62.149, M62.151, M62.152, M62.159, M62.161, M62.162, M62.169, M62.171, M62.172, M62.179, M62.18, M62.20, M62.211, M62.212, M62.219, M62.221, M62.222, M62.229, M62.231, M62.232, M62.239, M62.241, M62.242, M62.249, M62.251, M62.252, M62.259, M62.261, M62.262, M62.269, M62.271, M62.272, M62.279, M62.28, M62.3, M62.40,

M62.411, M62.412, M62.419, M62.421, M62.422, M62.429, M62.431, M62.432, M62.439, M62.441, M62.442, M62.449, M62.451, M62.452, M62.459, M62.461, M62.462, M62.469, M62.471, M62.472, M62.479, M62.48, M62.49, M62.50, M62.511, M62.512, M62.519, M62.521, M62.522, M62.529, M62.531, M62.532, M62.539, M62.541, M62.542, M62.549, M62.551, M62.552, M62.559, M62.561, M62.562, M62.569, M62.571, M62.572, M62.579, M62.58, M62.59, M62.81, M62.82, M62.831, M62.838, M62.84, M62.89, M62.9, M63.80, M63.811, M63.812, M63.819, M63.821, M63.822, M63.829, M63.831, M63.832, M63.839, M63.841, M63.842, M63.849, M63.851, M63.852, M63.859, M63.861, M63.862, M63.869, M63.871, M63.872, M63.879, M63.88, M63.89, M65.00, M65.011, M65.012, M65.019, M65.021, M65.022, M65.029, M65.031, M65.032, M65.039, M65.041, M65.042, M65.049, M65.051, M65.052, M65.059, M65.061, M65.062, M65.069, M65.071, M65.072, M65.079, M65.08, M65.10, M65.111, M65.112, M65.119, M65.121, M65.122, M65.129, M65.131, M65.132, M65.139, M65.141, M65.142, M65.149, M65.151, M65.152, M65.159, M65.161, M65.162, M65.169, M65.171, M65.172, M65.179, M65.18, M65.19, M65.20, M65.221, M65.222, M65.229, M65.231, M65.232, M65.239, M65.241, M65.242, M65.249, M65.251, M65.252, M65.259, M65.261, M65.262, M65.269, M65.271, M65.272, M65.279, M65.28, M65.29, M65.30, M65.311, M65.312, M65.319, M65.321, M65.322, M65.329, M65.331, M65.332, M65.339, M65.341, M65.342, M65.349, M65.351, M65.352, M65.359, M65.4, M65.80, M65.811, M65.812, M65.819, M65.821, M65.822, M65.829, M65.831, M65.832, M65.839, M65.841, M65.842, M65.849, M65.851, M65.852, M65.859, M65.861, M65.862, M65.869, M65.871, M65.872, M65.879, M65.88, M65.89, M65.9, M66.0, M66.10, M66.111, M66.112, M66.119, M66.121, M66.122, M66.129, M66.131, M66.132, M66.139, M66.141, M66.142, M66.143, M66.144, M66.145, M66.146, M66.151, M66.152, M66.159, M66.171, M66.172, M66.173, M66.174, M66.175, M66.176, M66.177, M66.178, M66.179, M66.18, M66.20, M66.211, M66.212, M66.219, M66.221, M66.222, M66.229, M66.231, M66.232, M66.239, M66.241, M66.242, M66.249, M66.251, M66.252, M66.259, M66.261, M66.262, M66.269, M66.271, M66.272, M66.279, M66.28, M66.29, M66.30, M66.311, M66.312, M66.319, M66.321, M66.322, M66.329, M66.331, M66.332, M66.339, M66.341, M66.342, M66.349, M66.351, M66.352, M66.359, M66.361, M66.362, M66.369, M66.371, M66.372, M66.379, M66.38, M66.39, M66.80, M66.811, M66.812, M66.819, M66.821, M66.822, M66.829, M66.831, M66.832, M66.839,

M66.841, M66.842, M66.849, M66.851, M66.852, M66.859, M66.861, M66.862, M66.869, M66.871, M66.872, M66.879, M66.88, M66.89, M66.9, M67.00, M67.01, M67.02, M67.20, M67.211, M67.212, M67.219, M67.221, M67.222, M67.229, M67.231, M67.232, M67.239, M67.241, M67.242, M67.249, M67.251, M67.252, M67.259, M67.261, M67.262, M67.269, M67.271, M67.272, M67.279, M67.28, M67.29, M67.30, M67.311, M67.312, M67.319, M67.321, M67.322, M67.329, M67.331, M67.332, M67.339, M67.341, M67.342, M67.349, M67.351, M67.352, M67.359, M67.361, M67.362, M67.369, M67.371, M67.372, M67.379, M67.38, M67.39, M67.40, M67.411, M67.412, M67.419, M67.421, M67.422, M67.429, M67.431, M67.432, M67.439, M67.441, M67.442, M67.449, M67.451, M67.452, M67.459, M67.461, M67.462, M67.469, M67.471, M67.472, M67.479, M67.48, M67.49, M67.50, M67.51, M67.52, M67.80, M67.811, M67.812, M67.813, M67.814, M67.819, M67.821, M67.822, M67.823, M67.824, M67.829, M67.831, M67.832, M67.833, M67.834, M67.839, M67.841, M67.842, M67.843, M67.844, M67.849, M67.851, M67.852, M67.853, M67.854, M67.859, M67.861, M67.862, M67.863, M67.864, M67.869, M67.871, M67.872, M67.873, M67.874, M67.879, M67.88, M67.89, M67.90, M67.911, M67.912, M67.919, M67.921, M67.922, M67.929, M67.931, M67.932, M67.939, M67.941, M67.942, M67.949, M67.951, M67.952, M67.959, M67.961, M67.962, M67.969, M67.971, M67.972, M67.979, M67.98, M67.99, M70.031, M70.032, M70.039, M70.041, M70.042, M70.049, M70.10, M70.11, M70.12, M70.20, M70.21, M70.22, M70.30, M70.31, M70.32, M70.40, M70.41, M70.42, M70.50, M70.51, M70.52, M70.60, M70.61, M70.62, M70.70, M70.71, M70.72, M70.80, M70.811, M70.812, M70.819, M70.821, M70.822, M70.829, M70.831, M70.832, M70.839, M70.841, M70.842, M70.849, M70.851, M70.852, M70.859, M70.861, M70.862, M70.869, M70.871, M70.872, M70.879, M70.88, M70.89, M70.90, M70.911, M70.912, M70.919, M70.921, M70.922, M70.929, M70.931, M70.932, M70.939, M70.941, M70.942, M70.949, M70.951, M70.952, M70.959, M70.961, M70.962, M70.969, M70.971, M70.972, M70.979, M70.98, M70.99, M71.00, M71.011, M71.012, M71.019, M71.021, M71.022, M71.029, M71.031, M71.032, M71.039, M71.041, M71.042, M71.049, M71.051, M71.052, M71.059, M71.061, M71.062, M71.069, M71.071, M71.072, M71.079, M71.08, M71.09, M71.10, M71.111, M71.112, M71.119, M71.121, M71.122, M71.129, M71.131, M71.132, M71.139, M71.141, M71.142, M71.149, M71.151, M71.152, M71.159, M71.161, M71.162, M71.169, M71.171, M71.172, M71.179, M71.18,

M71.19, M71.20, M71.21, M71.22, M71.30, M71.311, M71.312, M71.319, M71.321, M71.322, M71.329, M71.331, M71.332, M71.339, M71.341, M71.342, M71.349, M71.351, M71.352, M71.359, M71.371, M71.372, M71.379, M71.38, M71.39, M71.40, M71.421, M71.422, M71.429, M71.431, M71.432, M71.439, M71.441, M71.442, M71.449, M71.451, M71.452, M71.459, M71.461, M71.462, M71.469, M71.471, M71.472, M71.479, M71.48, M71.49, M71.50, M71.521, M71.522, M71.529, M71.531, M71.532, M71.539, M71.541, M71.542, M71.549, M71.551, M71.552, M71.559, M71.561, M71.562, M71.569, M71.571, M71.572, M71.579, M71.58, M71.80, M71.811, M71.812, M71.819, M71.821, M71.822, M71.829, M71.831, M71.832, M71.839, M71.841, M71.842, M71.849, M71.851, M71.852, M71.859, M71.861, M71.862, M71.869, M71.871, M71.872, M71.879, M71.88, M71.89, M71.9, M72.0, M72.1, M72.2, M72.4, M72.6, M72.8, M72.9, M75.00, M75.01, M75.02, M75.100, M75.101, M75.102, M75.110, M75.111, M75.112, M75.120, M75.121, M75.122, M75.20, M75.21, M75.22, M75.30, M75.31, M75.32, M75.40, M75.41, M75.42, M75.50, M75.51, M75.52, M75.80, M75.81, M75.82, M75.90, M75.91, M75.92, M76.00, M76.01, M76.02, M76.10, M76.11, M76.12, M76.20, M76.21, M76.22, M76.30, M76.31, M76.32, M76.40, M76.41, M76.42, M76.50, M76.51, M76.52, M76.60, M76.61, M76.62, M76.70, M76.71, M76.72, M76.811, M76.812, M76.819, M76.821, M76.822, M76.829, M76.891, M76.892, M76.899, M76.9, M77.00, M77.01, M77.02, M77.10, M77.11, M77.12, M77.20, M77.21, M77.22, M77.30, M77.31, M77.32, M77.40, M77.41, M77.42, M77.50, M77.51, M77.52, M77.8, M77.9, M79.0, M79.1, M79.10, M79.11, M79.12, M79.18, M79.2, M79.3, M79.4, M79.5, M79.601, M79.602, M79.603, M79.604, M79.605, M79.606, M79.609, M79.621, M79.622, M79.629, M79.631, M79.632, M79.639, M79.641, M79.642, M79.643, M79.644, M79.645, M79.646, M79.651, M79.652, M79.659, M79.661, M79.662, M79.669, M79.671, M79.672, M79.673, M79.674, M79.675, M79.676, M79.7, M79.81, M79.89, M79.9, M79.A11, M79.A12, M79.A19, M79.A21, M79.A22, M79.A29, M79.A3, M79.A9, R25.2, R29.3, R29.6, R29.810, R29.818, R29.890, R29.898, R29.90, R29.91, Z87.39, Z96.60, Z96.611, Z96.612, Z96.619, Z96.621, Z96.622, Z96.629, Z96.631, Z96.632, Z96.639, Z96.641, Z96.642, Z96.643, Z96.649, Z96.651, Z96.652, Z96.653, Z96.659, Z96.661, Z96.662, Z96.669, Z96.691, Z96.692, Z96.693, Z96.698, Z96.7, Z97.10, Z97.11, Z97.12, Z97.13, Z97.14, Z97.15, Z97.16, Z98.1

**Muscle Atrophy Weakness**

728.2, 728.87

M62.50, M62.511, M62.512, M62.519, M62.521, M62.522,  
M62.529, M62.531, M62.532, M62.539, M62.541, M62.542,  
M62.549, M62.551, M62.552, M62.559, M62.561, M62.562,  
M62.569, M62.571, M62.572, M62.579, M62.58, M62.59,  
M62.81

**Myalgia**

729.1

M60.9, M79.1, M79.10, M79.11, M79.12, M79.18, M79.7

---

**Supplemental Table S4. Regression Results for Unmatched Cohorts of Adults with and without Traumatic Spinal Cord Injury**

|                                  | Estimate | StdErr | HR               | 95% CI |       | P      |
|----------------------------------|----------|--------|------------------|--------|-------|--------|
| <i>SCI</i>                       | -0.948   | 0.138  |                  |        |       | <0.001 |
| <i>Age 65+</i>                   | -2.380   | 0.024  |                  |        |       | <0.001 |
| <i>SCI * Age 65+</i>             | 0.423    | 0.141  |                  |        |       | 0.003  |
| <i>Female</i>                    | -0.179   | 0.009  | 1.245            | 1.218  | 1.274 | <0.001 |
| <i>Race</i>                      |          |        |                  |        |       | <0.001 |
| <i>Asian</i>                     | 0.218    | 0.030  | 0.766            | 0.713  | 0.822 | <0.001 |
| <i>Black</i>                     | -0.048   | 0.017  | 1.060            | 1.017  | 1.105 | 0.006  |
| <i>Hispanic</i>                  | 0.038    | 0.017  | 0.955            | 0.917  | 0.995 | 0.027  |
| <i>Unknown/Missing</i>           | -0.012   | 0.014  | 1.015            | 0.982  | 1.050 | 0.385  |
| <i>White</i>                     |          |        | <i>Reference</i> |        |       |        |
| <i>Division</i>                  |          |        |                  |        |       | <0.001 |
| <i>East North Central</i>        | -0.050   | 0.020  | 1.063            | 1.014  | 1.114 | 0.011  |
| <i>East South Central</i>        | -0.168   | 0.029  | 1.229            | 1.147  | 1.316 | <0.001 |
| <i>Middle Atlantic</i>           | -0.107   | 0.022  | 1.140            | 1.082  | 1.202 | <0.001 |
| <i>Mountain</i>                  | -0.019   | 0.019  | 1.024            | 0.977  | 1.072 | 0.324  |
| <i>New England</i>               | -0.173   | 0.025  | 1.236            | 1.164  | 1.312 | <0.001 |
| <i>Pacific</i>                   | -0.229   | 0.017  | 1.324            | 1.271  | 1.378 | <0.001 |
| <i>South Atlantic</i>            | 0.002    | 0.018  | 0.998            | 0.956  | 1.042 | 0.930  |
| <i>Unknown</i>                   | -0.171   | 0.040  | 1.233            | 1.119  | 1.358 | <0.001 |
| <i>West North Central</i>        | 0.049    | 0.021  | 0.941            | 0.896  | 0.989 | 0.017  |
| <i>West South Central</i>        |          |        | <i>Reference</i> |        |       |        |
| <i>Elixhauser</i>                | -0.104   | 0.002  | 1.135            | 1.130  | 1.141 | <0.001 |
| <i>Education</i>                 |          |        |                  |        |       | <0.001 |
| <i>Less than 12th Grade</i>      | -0.049   | 0.049  | 1.062            | 0.945  | 1.194 | 0.313  |
| <i>High School Diploma</i>       | 0.000    | 0.011  | 1.000            | 0.973  | 1.027 | 0.977  |
| <i>Bachelor Degree Plus</i>      | -0.069   | 0.015  | 1.089            | 1.051  | 1.127 | <0.001 |
| <i>Unknown/Missing</i>           | 0.780    | 0.027  | 0.385            | 0.361  | 0.410 | <0.001 |
| <i>Less than Bachelor Degree</i> |          |        | <i>Reference</i> |        |       |        |
| <i>Net-worth</i>                 |          |        |                  |        |       | <0.001 |
| <i>Unknown/Missing</i>           | -0.646   | 0.016  | 2.207            | 2.124  | 2.294 | <0.001 |
| <\$25K                           | -0.222   | 0.017  | 1.312            | 1.259  | 1.368 | <0.001 |
| \$25K-\$149K                     | -0.218   | 0.017  | 1.306            | 1.255  | 1.359 | <0.001 |
| \$150K-\$249K                    | -0.172   | 0.018  | 1.234            | 1.181  | 1.289 | <0.001 |
| \$250K-\$499K                    | -0.153   | 0.015  | 1.206            | 1.162  | 1.251 | <0.001 |
| \$500K+                          |          |        | <i>Reference</i> |        |       |        |

Source: The 2007-2017 OptumInsight

Abbreviations: StdErr: Standard Error; HR: Hazard Ratio; CI: Confidence Interval.

**Supplemental Table S5. Regression Results for Matched Cohorts of Adults with and without Traumatic Spinal Cord Injury**

|                                  | Estimate | StdErr | HR               | 95% CI |       | P      |
|----------------------------------|----------|--------|------------------|--------|-------|--------|
| <i>SCI</i>                       | -0.719   | 0.334  |                  |        |       | 0.031  |
| <i>Age 65+</i>                   | -2.792   | 0.293  |                  |        |       | <0.001 |
| <i>SCI * Age 65+</i>             | 0.097    | 0.341  |                  |        |       | 0.777  |
| <i>Female</i>                    | -0.179   | 0.073  | 1.177            | 1.033  | 1.342 | 0.014  |
| <i>Race</i>                      |          |        |                  |        |       | 0.011  |
| <i>Asian</i>                     | 0.042    | 0.211  | 0.963            | 0.660  | 1.405 | 0.844  |
| <i>Black</i>                     | 0.213    | 0.154  | 0.823            | 0.625  | 1.084 | 0.167  |
| <i>Hispanic</i>                  | -0.192   | 0.124  | 1.192            | 0.955  | 1.487 | 0.120  |
| <i>Unknown/Missing</i>           | -0.237   | 0.096  | 1.242            | 1.045  | 1.475 | 0.014  |
| <i>White</i>                     |          |        | <i>Reference</i> |        |       |        |
| <i>Division</i>                  |          |        |                  |        |       | 0.076  |
| <i>East North Central</i>        | -0.198   | 0.136  | 1.198            | 0.939  | 1.528 | 0.146  |
| <i>East South Central</i>        | -0.091   | 0.204  | 1.087            | 0.755  | 1.566 | 0.654  |
| <i>Middle Atlantic</i>           | -0.064   | 0.167  | 1.060            | 0.787  | 1.429 | 0.701  |
| <i>Mountain</i>                  | 0.179    | 0.132  | 0.849            | 0.671  | 1.075 | 0.174  |
| <i>New England</i>               | 0.106    | 0.181  | 0.908            | 0.657  | 1.255 | 0.559  |
| <i>Pacific</i>                   | -0.031   | 0.117  | 1.028            | 0.834  | 1.268 | 0.793  |
| <i>South Atlantic</i>            | 0.068    | 0.125  | 0.940            | 0.752  | 1.175 | 0.587  |
| <i>Unknown</i>                   | 0.410    | 0.358  | 0.688            | 0.363  | 1.305 | 0.252  |
| <i>West North Central</i>        | 0.315    | 0.158  | 0.750            | 0.565  | 0.995 | 0.046  |
| <i>West South Central</i>        |          |        | <i>Reference</i> |        |       |        |
| <i>Elixhauser</i>                | -0.085   | 0.013  | 1.081            | 1.056  | 1.107 | <0.001 |
| <i>Education</i>                 |          |        |                  |        |       | <0.001 |
| <i>Less than 12th Grade</i>      | -0.039   | 0.359  | 1.036            | 0.545  | 1.970 | 0.913  |
| <i>High School Diploma</i>       | -0.069   | 0.084  | 1.065            | 0.916  | 1.239 | 0.412  |
| <i>Bachelor Degree Plus</i>      | -0.168   | 0.107  | 1.166            | 0.963  | 1.411 | 0.115  |
| <i>Unknown/Missing</i>           | 1.154    | 0.292  | 0.348            | 0.207  | 0.588 | <0.001 |
| <i>Less than Bachelor Degree</i> |          |        | <i>Reference</i> |        |       |        |
| <i>Net worth</i>                 |          |        |                  |        |       | <0.001 |
| <i>Unknown/Missing</i>           | -0.676   | 0.118  | 1.854            | 1.500  | 2.292 | <0.001 |
| <\$25K                           | -0.313   | 0.125  | 1.332            | 1.064  | 1.666 | 0.012  |
| \$25K-\$149K                     | -0.323   | 0.120  | 1.343            | 1.084  | 1.665 | 0.007  |
| \$150K-\$249K                    | -0.104   | 0.144  | 1.099            | 0.850  | 1.421 | 0.470  |
| \$250K-\$499K                    | -0.101   | 0.123  | 1.097            | 0.881  | 1.366 | 0.409  |
| \$500K+                          |          |        | <i>Reference</i> |        |       |        |

Source: The 2007-2017 OptumInsight

Abbreviations: StdErr: Standard Error; HR: Hazard Ratio; CI: Confidence Interval.

**Supplemental Table S6. Adjusted Predicted Incremental Hazards of Traumatic Brain Injury and Cardiovascular Disease for ADRD after Traumatic Spinal Cord Injury among Unmatched Cohorts of Adults**

| <b>TSCI</b> | <b>TBI</b>      | <b>TSCI</b> | <b>TBI</b>      | <b>Estimate</b> | <b>Std Err</b> | <b>Hazard Ratio</b> | <b>HR Lower</b> | <b>HR Upper</b> | <b>P-value</b> |
|-------------|-----------------|-------------|-----------------|-----------------|----------------|---------------------|-----------------|-----------------|----------------|
| Yes         | Yes             | Yes         | No              | 0.068           | 0.190          | 0.920               | 0.583           | 1.450           | 0.718          |
| Yes         | Yes             | No          | Yes             | 0.006           | 0.223          | 0.992               | 0.581           | 1.693           | 0.977          |
| Yes         | Yes             | No          | No              | -0.716          | 0.198          | 2.403               | 1.492           | 3.870           | <0.001         |
| Yes         | No              | No          | Yes             | -0.062          | 0.126          | 1.079               | 0.798           | 1.459           | 0.621          |
| Yes         | No              | No          | No              | -0.784          | 0.074          | 2.613               | 2.185           | 3.125           | <0.001         |
| No          | Yes             | No          | No              | -0.722          | 0.102          | 2.422               | 1.898           | 3.091           | <0.001         |
| <b>TSCI</b> | <b>Prior CV</b> | <b>TSCI</b> | <b>Prior CV</b> | <b>Estimate</b> | <b>Std Err</b> | <b>Hazard Ratio</b> | <b>HR Lower</b> | <b>HR Upper</b> | <b>P-value</b> |
| Yes         | Yes             | Yes         | No              | 0.152           | 0.087          | 0.830               | 0.674           | 1.023           | 0.081          |
| Yes         | Yes             | No          | Yes             | -0.310          | 0.126          | 1.462               | 1.079           | 1.979           | 0.014          |
| Yes         | Yes             | No          | No              | -0.316          | 0.127          | 1.473               | 1.087           | 1.997           | 0.013          |
| Yes         | No              | No          | Yes             | -0.462          | 0.141          | 1.760               | 1.255           | 2.469           | 0.001          |
| Yes         | No              | No          | No              | -0.468          | 0.141          | 1.774               | 1.265           | 2.488           | <0.001         |
| No          | Yes             | No          | No              | -0.006          | 0.013          | 1.008               | 0.978           | 1.039           | 0.610          |

Source: The 2007-2017 OptumInsight

Abbreviations: TSCI: Traumatic Spinal Cord Injury; TBI: Traumatic Brain Injury; CV: Cardiovascular Disease; Std Err: Standard Error; HR: Hazard Ratio.



**Supplemental Table S7. Adjusted Predicted Incremental Hazards of Traumatic Brain Injury and Cardiovascular Disease for ADRD after Traumatic Spinal Cord Injury among Matched Cohorts of Adults**

| TSCI | TBI      | TSCI | TBI      | Estimate | Std Err | Hazard Ratio | HR Lower | HR Upper | P-value |
|------|----------|------|----------|----------|---------|--------------|----------|----------|---------|
| Yes  | Yes      | Yes  | No       | 0.064    | 0.264   | 0.943        | 0.588    | 1.513    | 0.808   |
| Yes  | Yes      | No   | Yes      | -0.713   | 1.141   | 1.919        | 0.249    | 14.800   | 0.532   |
| Yes  | Yes      | No   | No       | -0.777   | 0.316   | 2.034        | 1.154    | 3.584    | 0.014   |
| Yes  | No       | No   | Yes      | -0.778   | 1.112   | 2.035        | 0.278    | 14.901   | 0.484   |
| Yes  | No       | No   | No       | -0.842   | 0.186   | 2.157        | 1.545    | 3.012    | <0.001  |
| No   | Yes      | No   | No       | -0.064   | 1.098   | 1.060        | 0.148    | 7.568    | 0.954   |
| TSCI | Prior CV | TSCI | Prior CV | Estimate | Std Err | Hazard Ratio | HR Lower | HR Upper | P-value |
| Yes  | Yes      | Yes  | No       | 0.058    | 0.131   | 0.948        | 0.750    | 1.200    | 0.658   |
| Yes  | Yes      | No   | Yes      | -0.484   | 0.587   | 1.556        | 0.544    | 4.452    | 0.410   |
| Yes  | Yes      | No   | No       | -1.013   | 0.613   | 2.523        | 0.842    | 7.562    | 0.098   |
| Yes  | No       | No   | Yes      | -0.542   | 0.595   | 1.640        | 0.565    | 4.764    | 0.363   |
| Yes  | No       | No   | No       | -1.071   | 0.617   | 2.661        | 0.881    | 8.035    | 0.083   |
| No   | Yes      | No   | No       | -0.529   | 0.202   | 1.622        | 1.130    | 2.328    | 0.009   |

Source: The 2007-2017 OptumInsight

Abbreviations: TSCI: Traumatic Spinal Cord Injury; TBI: Traumatic Brain Injury; CV: Cardiovascular Disease; Std Err: Standard Error; HR: Hazard Ratio.
